# Supplementary material
Source: PubMed Central journal article supplement (PMC3363417)
Supplement: ja3010094_si_001.pdf [file ja3010094_si_001.pdf]

## Supporting Information

### Exocyclic Carbons Adjacent to the N<sup>6</sup> of Adenine are Targets for Oxidation by the *Escherichia coli* Adaptive Response Protein AlkB

Deyu Li,<sup>§,¶,†</sup> James C. Delaney,<sup>§,¶,†,±</sup> Charlotte M. Page,<sup>§,¶,†,⊥</sup> Xuedong Yang,<sup>§,¶,†,Δ</sup> Alvin S.  
Chen,<sup>§,¶,†,⊥</sup> Cintyu Wong,<sup>¶,†,‡,#,◇</sup> Catherine L. Drennan,<sup>¶,†,‡,#</sup> and John M. Essigmann<sup>§,¶,†,\*</sup>

<sup>§</sup>Department of Biological Engineering, Massachusetts Institute of Technology,  
Cambridge, Massachusetts 02139, USA

<sup>¶</sup>Center for Environmental Health Sciences, Massachusetts Institute of Technology,  
Cambridge, Massachusetts 02139, USA

<sup>†</sup>Department of Chemistry, Massachusetts Institute of Technology, Cambridge,  
Massachusetts 02139, USA

<sup>‡</sup>Department of Biology, Massachusetts Institute of Technology, Cambridge,  
Massachusetts 02139, USA

<sup>#</sup>Howard Hughes Medical Institute

#### Present Addresses

<sup>±</sup>Visterra Inc., Cambridge, MA 02139

<sup>⊥</sup>Department of Chemistry, Yale University, New Haven, Connecticut, 06520

<sup>Δ</sup>School of Pharmaceutical Science and Technology, Tianjin University, Tianjin, China,  
300072

<sup>†</sup>Harvard Medical School, 25 Shattuck Street, Boston, MA 02115

<sup>◇</sup>Johnson & Johnson Pharmaceutical Research & Development, 930 Route 202 South,  
Raritan, NJ 08869

\* To whom correspondence should be addressed. E-mail: [jessig@mit.edu](mailto:jessig@mit.edu)

**Table S1.** Percentages of the four species in the AlkB reactions on EA at 1, 2, 5, 10, 20, 40, 60, and 80 minute incubation time points (Data presented in Figure 4).

| Reaction time (min) | A%   | EA+2% | EA+16% | EA+32% |
|---------------------|------|-------|--------|--------|
| 1                   | 2.6  | 7.0   | 89.7   | 0.7    |
| 2                   | 2.9  | 7.0   | 89.4   | 0.7    |
| 5                   | 2.7  | 5.1   | 91.5   | 0.6    |
| 10                  | 4.4  | 7.9   | 86.9   | 0.8    |
| 20                  | 5.9  | 8.9   | 84.2   | 1.0    |
| 40                  | 6.3  | 9.7   | 83.0   | 1.0    |
| 60                  | 8.9  | 11.2  | 78.7   | 1.2    |
| 80                  | 10.0 | 11.3  | 77.4   | 1.3    |

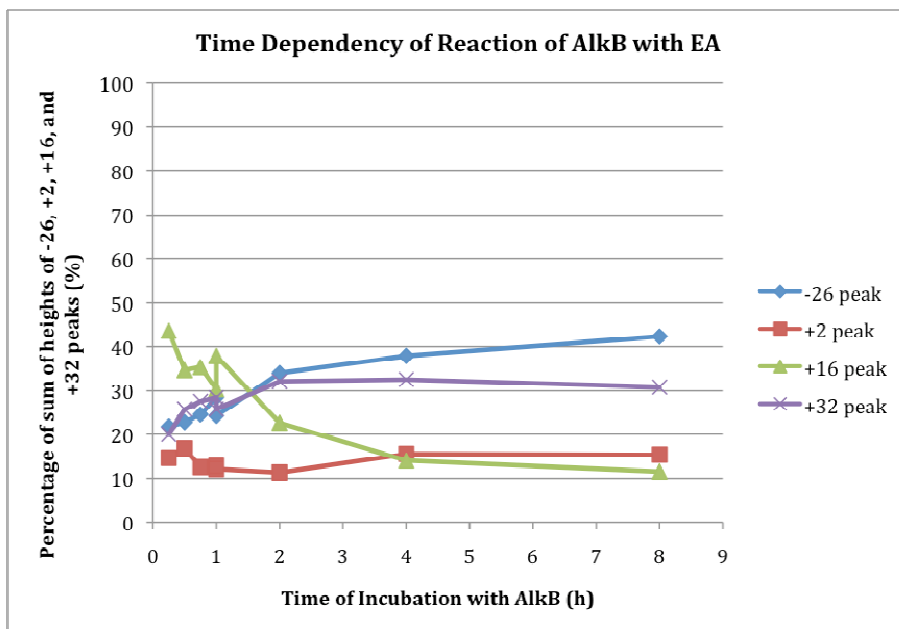

**Figure S1.** Time dependence of EA reaction with AlkB (Molar ratio: DNA:AlkB = 2:1).

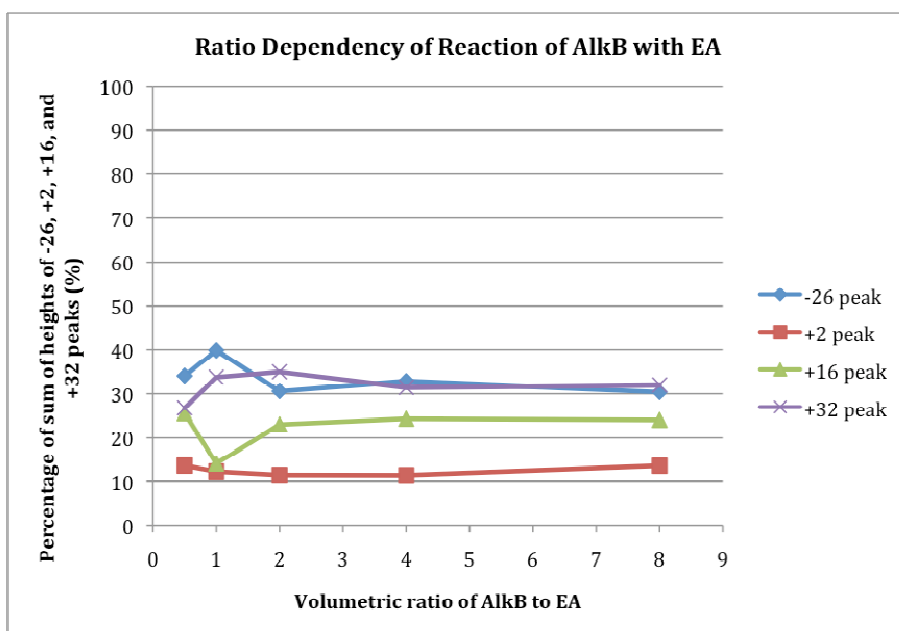

**Figure S2.** Stoichiometric dependence of EA reaction with AlkB (4h Reaction, molar ratio: DNA:AlkB = 2:1/2:2/2:4/2:8/2:16).

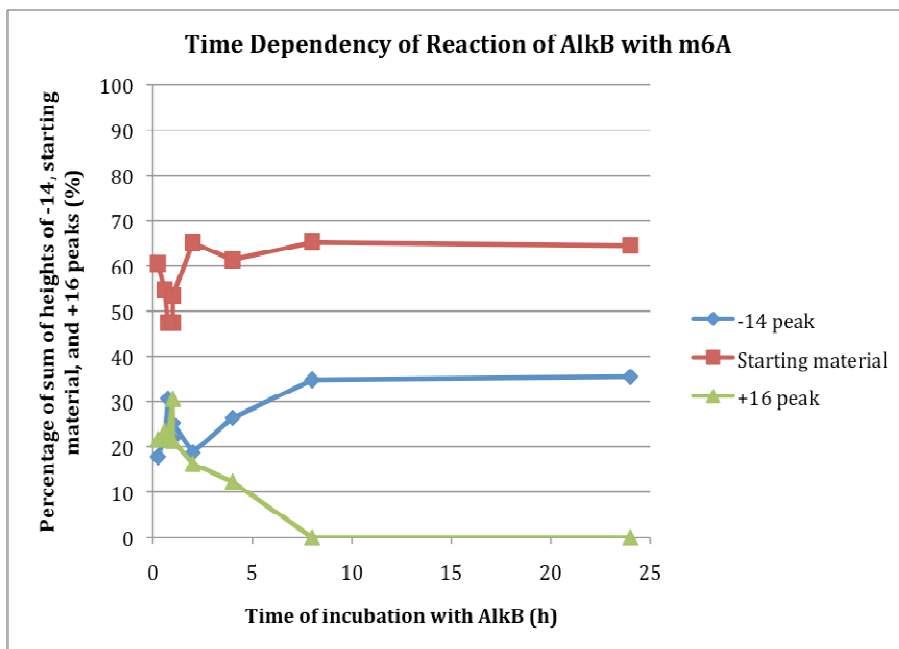

**Figure S3.** Time dependence of m6A reaction with AlkB (Molar ratio: DNA:AlkB = 2:1).

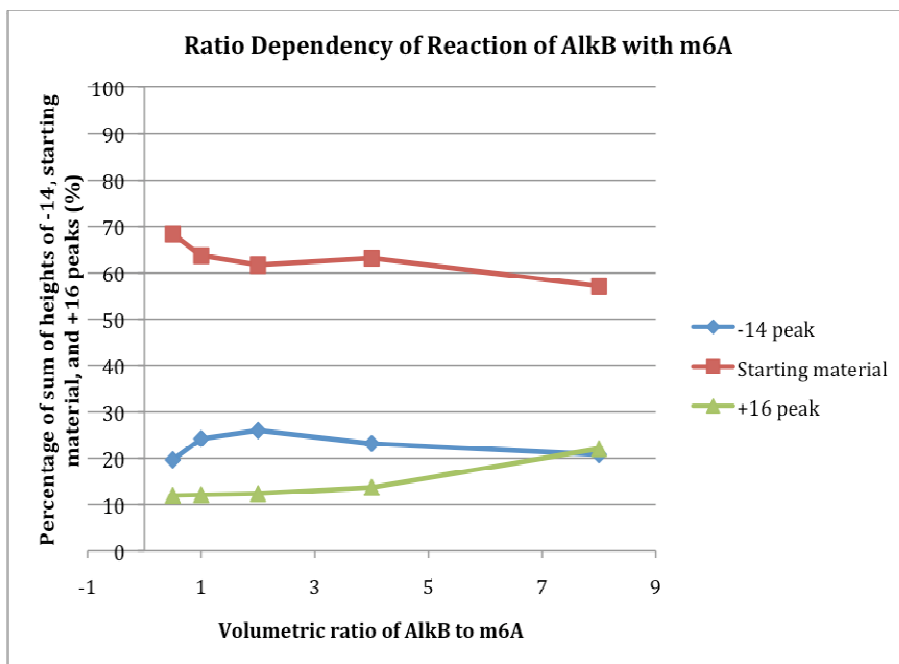

**Figure S4.** Stoichiometric dependence of m6A reaction with AlkB (4h Reaction, volumetric ratio: DNA:AlkB = 2:1/2:2/2:4/2:8/2:16).
